# Supplementary material for: Design of an Amphiphilic Poly(aspartamide)-Mediated Self-Assembled Nanoconstruct for Long-Term Tumor Targeting and Bioimaging
Source: MDPI journal article supplement (doi:10.3390/molecules24050885), 2019-03-02
Supplement: s1 [file s1]

## Supplementary materials

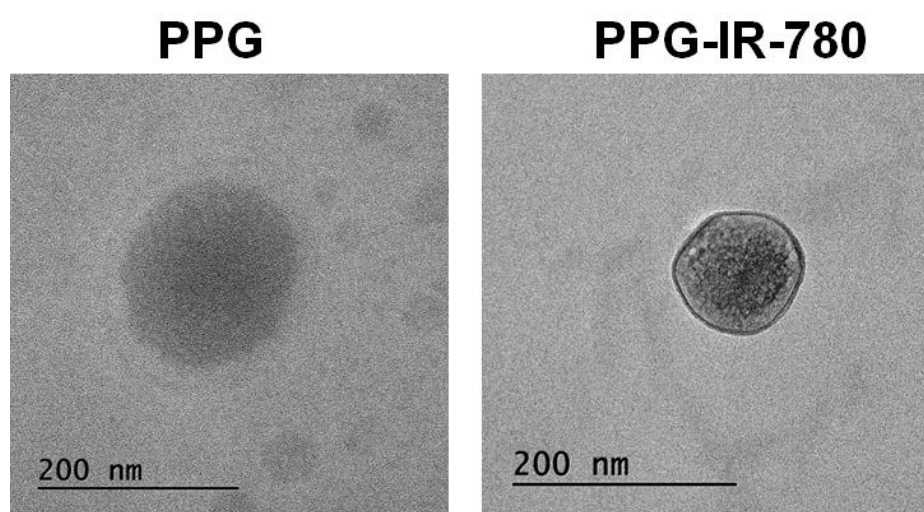

**Figure S1.** FE-TEM images of PPG and PPG-IR-780 NPs.

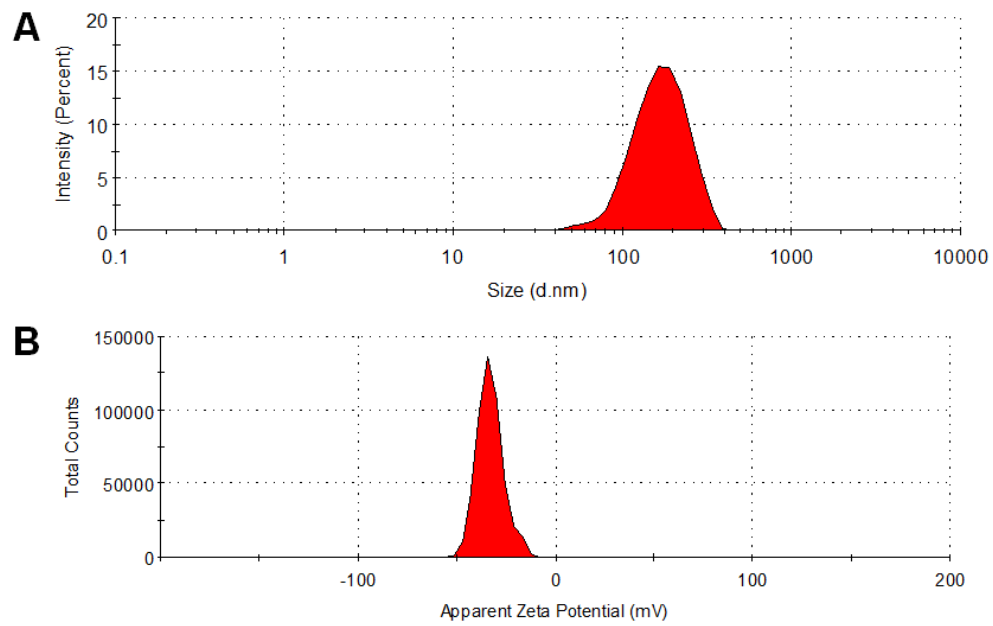

**Figure S2.** (A) Hydrodynamic size and (B) Zeta potential of PPG-cRGD-IR-780 NPs measured by Zeta sizer.

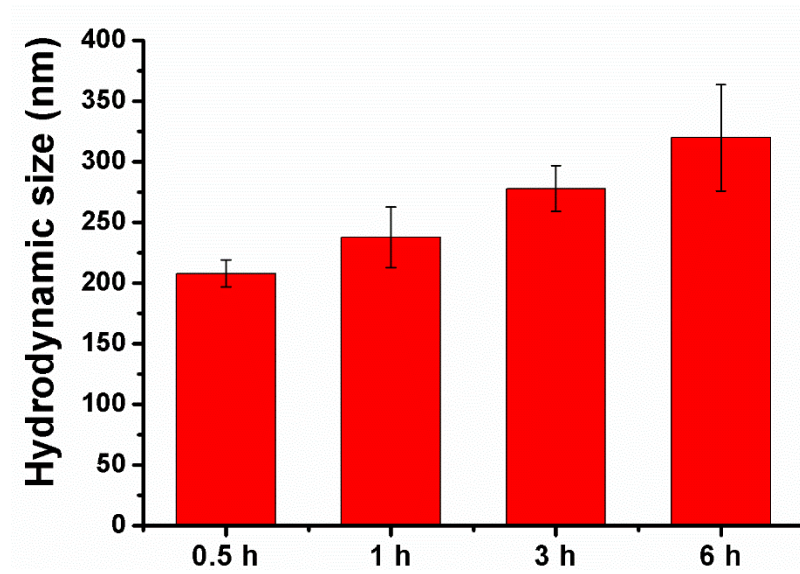

**Figure S3.** DLS analysis of PPG-cRGD-IR-780 NPs after incubation with 10 % mouse plasma in a time-dependent manner.

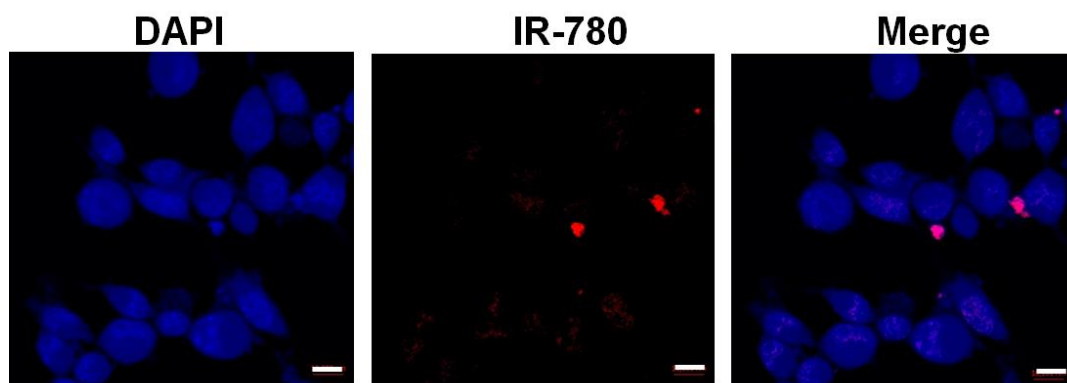

**Figure S4.** Confocal images of intracellular uptake of IR-780 after 4-h incubation. The nucleus was stained with DAPI (blue). Scale bar: 10  $\mu\text{m}$ .
